# Supplementary material for: Iron Metabolism and Idiopathic Pulmonary Arterial Hypertension: New Insights from Bioinformatic Analysis
Source: Hindawi journal article supplement (doi:10.1155/2021/5669412), 2021-01-01
Supplement: f1 [file 5669412.f1.zip]

**Table S4 Rank values of DEIMRGs**

| <b>Node name</b> | <b>Degree</b> |
|------------------|---------------|
| HMOX1            | 46935         |
| GCLC             | 46874         |
| NQO1             | 46744         |
| TXNRD1           | 46717         |
| GCLM             | 46370         |
| SRXN1            | 46081         |
| GPX2             | 45606         |
| PRDX1            | 40472         |
| SLC7A11          | 40447         |
| G6PD             | 5074          |
| SQSTM1           | 996           |
| HSPA5            | 543           |
| JUN              | 417           |
| MAPK8            | 292           |
| TLR4             | 290           |
| VEGFA            | 265           |
| AKR1C2           | 240           |
| CYBB             | 142           |
| AKR1C3           | 123           |
| CBSL             | 122           |
| NFE2             | 64            |
| ALAS2            | 40            |
| PGD              | 31            |
| SLC25A37         | 31            |
| ATP6V1A          | 28            |
| HEPH             | 26            |
| ATP6V1B2         | 26            |
| HBB              | 26            |
| ATP6V0D1         | 25            |
| SLC39A8          | 24            |
| TMEM199          | 24            |
| ATP6V1D          | 24            |
| STEAP3           | 20            |
| CTSB             | 17            |
| HMBS             | 17            |
| SLC11A1          | 16            |
| SLC25A28         | 16            |
| IDH1             | 14            |
| HBA2             | 14            |
| HBD              | 12            |
| EPOR             | 11            |
| ABCB6            | 11            |
| LCN2             | 9             |
| BLVRB            | 9             |
| FLT3             | 8             |
| FBXW7            | 7             |
| SCD              | 6             |
| NCF2             | 6             |

|           |   |
|-----------|---|
| GABARAPL1 | 6 |
| PSAT1     | 6 |
| CYP1B1    | 5 |
| SLC3A2    | 4 |
| MSMO1     | 4 |
| BCL2      | 4 |
| FLVCR2    | 4 |
| UCP2      | 3 |
| CDO1      | 3 |
| CA2       | 3 |
| BMP6      | 3 |
| BTG2      | 3 |
| BLVRA     | 3 |
| ABCG2     | 3 |
| SLC6A9    | 3 |
| SC5D      | 2 |
| LTF       | 2 |
| HERPUD1   | 2 |
| FADS2     | 2 |
| DNM2      | 2 |
| MCOLN1    | 2 |
| CTNS      | 2 |
| AIFM2     | 2 |
| SCARA5    | 1 |
| TSPAN5    | 1 |
| IGSF3     | 1 |
| MPP1      | 1 |
| ENPP2     | 1 |
| CTSE      | 1 |
| NEO1      | 1 |
| TBXAS1    | 1 |
| SLC22A4   | 1 |

---
