# Supplementary material for: Iron Metabolism and Idiopathic Pulmonary Arterial Hypertension: New Insights from Bioinformatic Analysis
Source: Hindawi journal article supplement (doi:10.1155/2021/5669412), 2021-01-01
Supplement: f1 [file 5669412.f1.zip]

**Table S5** The proportion of infiltrating immune cells estimated by the CIBERSORT algorithm in GSE117261

[illegible]
