# Supplementary material for: Iron Metabolism and Idiopathic Pulmonary Arterial Hypertension: New Insights from Bioinformatic Analysis
Source: Hindawi journal article supplement (doi:10.1155/2021/5669412), 2021-01-01
Supplement: f1 [file 5669412.f1.zip]

**Table S2 Dysregulated miRNAs in IPAH samples**

| miRNA ID         | Regulation in IPAH samples | Organism     | Experiment type             | Functional validation | PMID     | Author            | Year |
|------------------|----------------------------|--------------|-----------------------------|-----------------------|----------|-------------------|------|
| hsa-let-7a-5p    | Up-regulation              | Homo sapiens | miRNAs-microarray + qRT-PCR | No                    | 27188753 | Wu et al          | 2016 |
| hsa-miR-124-3p   | Down-regulation            | Homo sapiens | miRNAs-microarray + qRT-PCR | Yes                   | 28971999 | Paola et al       | 2017 |
| hsa-miR-124-3p   | Down-regulation            | Homo sapiens | qRT-PCR                     | Yes                   | 24122720 | Wang et al        | 2013 |
| hsa-miR-138-5p   | Up-regulation              | Homo sapiens | miRNAs-microarray + qRT-PCR | Yes                   | 31553627 | Aleksandra et al  | 2019 |
| hsa-miR-1-3p     | Up-regulation              | Homo sapiens | miRNAs-microarray + qRT-PCR | No                    | 25815108 | Irene et al       | 2015 |
| hsa-miR-145-5p   | Up-regulation              | Homo sapiens | miRNAs-microarray + qRT-PCR | No                    | 25815108 | Irene et al       | 2015 |
| hsa-miR-150-5p   | Down-regulation            | Homo sapiens | miRNAs-microarray + qRT-PCR | No                    | 23220912 | Christopher et al | 2013 |
| hsa-miR-150-5p   | Down-regulation            | Homo sapiens | qRT-PCR                     | Yes                   | 33335799 | Giusy et al       | 2020 |
| hsa-miR-191-5p   | Up-regulation              | Homo sapiens | miRNAs-microarray + qRT-PCR | No                    | 25815108 | Irene et al       | 2015 |
| hsa-miR-199a-3p  | Up-regulation              | Homo sapiens | miRNAs-microarray + qRT-PCR | No                    | 27188753 | Wu et al          | 2016 |
| hsa-miR-199a-5P  | Down-regulation            | Homo sapiens | miRNAs-microarray + qRT-PCR | No                    | 25815108 | Irene et al       | 2015 |
| hsa-miR-204-5p   | Down-regulation            | Homo sapiens | miRNAs-microarray + qRT-PCR | Yes                   | 21321078 | Audrey et al      | 2011 |
| hsa-miR-204-5P   | Down-regulation            | Homo sapiens | miRNAs-microarray + qRT-PCR | No                    | 25815108 | Irene et al       | 2015 |
| hsa-miR-20a-5p   | Up-regulation              | Homo sapiens | miRNAs-microarray + qRT-PCR | No                    | 25815108 | Irene et al       | 2015 |
| hsa-miR-222-3p   | Up-regulation              | Homo sapiens | miRNAs-microarray + qRT-PCR | Yes                   | 31553627 | Aleksandra et al  | 2019 |
| hsa-miR-223-3p   | Up-regulation              | Homo sapiens | miRNAs-microarray + qRT-PCR | Yes                   | 30507047 | Liu et al         | 2018 |
| hsa-miR-23a-3p   | Up-regulation              | Homo sapiens | miRNAs-microarray + qRT-PCR | No                    | 25815108 | Irene et al       | 2015 |
| hsa-miR-23b-3p   | Up-regulation              | Homo sapiens | miRNAs-microarray + qRT-PCR | No                    | 25815108 | Irene et al       | 2015 |
| hsa-miR-26b-5p   | Up-regulation              | Homo sapiens | miRNAs-microarray + qRT-PCR | No                    | 27188753 | Wu et al          | 2016 |
| hsa-miR-27a-3p   | Up-regulation              | Homo sapiens | miRNAs-microarray + qRT-PCR | No                    | 25815108 | Irene et al       | 2015 |
| hsa-miR-27b-3p   | Up-regulation              | Homo sapiens | miRNAs-microarray + qRT-PCR | No                    | 27188753 | Wu et al          | 2016 |
| hsa-miR-29b-3p   | Up-regulation              | Homo sapiens | miRNAs-microarray + qRT-PCR | Yes                   | 31553627 | Aleksandra et al  | 2019 |
| hsa-miR-30c-2-3p | Down-regulation            | Homo sapiens | miRNAs-microarray + qRT-PCR | No                    | 25815108 | Irene et al       | 2015 |
| hsa-miR-330-3P   | Down-regulation            | Homo sapiens | miRNAs-microarray + qRT-PCR | No                    | 25815108 | Irene et al       | 2015 |
| hsa-miR-483-3p   | Down-regulation            | Homo sapiens | RNA-sequencing + qRT-PCR    | Yes                   | 32324970 | Zhang et al       | 2020 |
| hsa-miR-483-5p   | Down-regulation            | Homo sapiens | RNA-sequencing + qRT-PCR    | Yes                   | 32324970 | Zhang et al       | 2020 |
| hsa-miR-99a-5p   | Down-regulation            | Homo sapiens | miRNAs-microarray + qRT-PCR | No                    | 25815108 | Irene et al       | 2015 |
