# Supplementary material for: Iron Metabolism and Idiopathic Pulmonary Arterial Hypertension: New Insights from Bioinformatic Analysis
Source: Hindawi journal article supplement (doi:10.1155/2021/5669412), 2021-01-01
Supplement: f1 [file 5669412.f1.zip]

Table S7 Predicted target drug using the DSigDB database

| Term                                          | P-value     | Odds Ratio | Combined Score | Genes                                       |
|-----------------------------------------------|-------------|------------|----------------|---------------------------------------------|
| celastrol CTD 00002186                        | 6.51E-11    | 512.783505 | 12027.55685    | TXNRD1;BCL2;MSMO1;SLC7A11;GCLM              |
| cinnamaldehyde CTD 00000671                   | 7.45E-10    | 309.890625 | 6513.108816    | SRXN1;TXNRD1;BCL2;SLC7A11;GCLM              |
| Diquat dication CTD 00005858                  | 7.78E-10    | 648.845529 | 13608.70128    | SRXN1;TXNRD1;SLC7A11;GCLM                   |
| 7-ACA CTD 00001461                            | 9.54E-09    | 1362.40909 | 25160.78662    | TXNRD1;SLC7A11;GCLM                         |
| gedunin CTD 00003449                          | 1.27E-08    | 312.282353 | 5678.058245    | TXNRD1;MSMO1;SLC7A11;GCLM                   |
| EPICHLOROHYDRIN CTD 00005906                  | 2.14E-08    | 998.9      | 17641.76329    | TXNRD1;SLC7A11;GCLM                         |
| CHLOROPICRIN CTD 00003338                     | 2.14E-08    | 998.9      | 17641.76329    | TXNRD1;SLC7A11;GCLM                         |
| securinine MCF7 UP                            | 3.48E-08    | 832.291667 | 14293.03881    | TXNRD1;SLC7A11;GCLM                         |
| oxyphenbutazone MCF7 UP                       | 4.03E-08    | 788.447368 | 13424.62308    | TXNRD1;SLC7A11;GCLM                         |
| carmustine MCF7 UP                            | 4.64E-08    | 748.9875   | 12648.18423    | TXNRD1;SLC7A11;GCLM                         |
| HEXANE CTD 00001239                           | 0.00000053  | 713.285714 | 11950.14616    | SRXN1;TXNRD1;GCLM                           |
| 5194442 MCF7 UP                               | 6.02E-08    | 680.829546 | 11319.45464    | TXNRD1;SLC7A11;GCLM                         |
| ebiselen MCF7 UP                              | 0.000000068 | 651.195652 | 10747.0207     | TXNRD1;SLC7A11;GCLM                         |
| benzoic acid CTD 00007316                     | 7.65E-08    | 624.03125  | 10225.30468    | SRXN1;TXNRD1;GCLM                           |
| lactic acid CTD 00007283                      | 7.65E-08    | 624.03125  | 10225.30468    | SRXN1;TXNRD1;GCLM                           |
| isotretinoin MCF7 UP                          | 8.57E-08    | 599.04     | 9748.001391    | TXNRD1;SLC7A11;GCLM                         |
| methyl salicylate CTD 00001586                | 0.000000118 | 534.776786 | 8533.330719    | SRXN1;TXNRD1;GCLM                           |
| nifuroxazide MCF7 UP                          | 0.000000118 | 534.776786 | 8533.330719    | TXNRD1;SLC7A11;GCLM                         |
| 1,6-Diisocyanatohexane CTD 00000793           | 0.00000013  | 516.310345 | 8187.916393    | TXNRD1;SLC7A11;GCLM                         |
| alpha-Hexylcinnamaldehyde CTD 00002937        | 0.000000143 | 499.075    | 7867.096685    | SRXN1;TXNRD1;GCLM                           |
| isopropanol CTD 00007325                      | 0.000000143 | 499.075    | 7867.096685    | SRXN1;TXNRD1;GCLM                           |
| cinnamyl alcohol CTD 00001006                 | 0.000000187 | 453.636364 | 7029.00711     | SRXN1;TXNRD1;GCLM                           |
| semustine MCF7 UP                             | 0.000000203 | 440.272059 | 6784.76713     | TXNRD1;SLC7A11;GCLM                         |
| Ammonium hexachloroplatinate(IV) CTD 00000945 | 0.000000239 | 415.770833 | 6339.845805    | TXNRD1;SLC7A11;GCLM                         |
| Bandrowski's base CTD 00002216                | 0.000000258 | 404.513514 | 6136.713336    | SRXN1;TXNRD1;GCLM                           |
| tert-Butylhydroquinone CTD 00000961           | 0.0000003   | 383.730769 | 5763.945414    | TXNRD1;BCL2;GCLM                            |
| 5182598 MCF7 UP                               | 0.000000322 | 374.11875  | 5592.564435    | TXNRD1;SLC7A11;GCLM                         |
| securinine HL60 UP                            | 0.000000346 | 364.97561  | 5430.167744    | TXNRD1;SLC7A11;GCLM                         |
| hydrogen peroxide CTD 00006118                | 0.000000756 | 121289     | 1709522.752    | SRXN1;TXNRD1;BCL2;TSPAN5;MSMO1;SLC7A11;GCLM |
| Tetradioxin CTD 00006848                      | 0.00000839  | 113624     | 1328140.359    | SRXN1;TXNRD1;BCL2;TSPAN5;MSMO1;SLC7A11;GCLM |
| mechlorethamine CTD 00006251                  | 0.000016    | 499.425    | 5514.422774    | TXNRD1;BCL2                                 |
| estradiol CTD 00005920                        | 0.0000224   | 109648     | 1173815.852    | SRXN1;TXNRD1;BCL2;TSPAN5;MSMO1;SLC7A11;GCLM |
| benzo[a]pyrene CTD 00005488                   | 0.0000258   | 109032     | 1151876.014    | SRXN1;TXNRD1;BCL2;TSPAN5;MSMO1;SLC7A11;GCLM |
| VALPROIC ACID CTD 00006977                    | 0.002138353 | 81816      | 502981.7918    | SRXN1;TXNRD1;BCL2;TSPAN5;MSMO1;SLC7A11;GCLM |
