# Supplementary material for: Iron Metabolism and Idiopathic Pulmonary Arterial Hypertension: New Insights from Bioinformatic Analysis
Source: Hindawi journal article supplement (doi:10.1155/2021/5669412), 2021-01-01
Supplement: f1 [file 5669412.f1.zip]

celastrol CTD 00002186

cinnamaldehyde CTD 00000671

Diquat dication CTD 00005858

7-ACA CTD 00001461

gedunin CTD 00003449

EPICHLOROHYDRIN CTD 00005906

CHLOROPICRIN CTD 00003338

Glycidamide CTD 00002776

securinine MCF7 UP

oxyphenbutazone MCF7 UP
