# Supplementary material for: Iron Metabolism and Idiopathic Pulmonary Arterial Hypertension: New Insights from Bioinformatic Analysis
Source: Hindawi journal article supplement (doi:10.1155/2021/5669412), 2021-01-01
Supplement: f1 [file 5669412.f1.zip]

**Table S3 Differentially expressed iron metabolism related gene set**

| Gene symbol | logFC        | FDR         | Trend          |
|-------------|--------------|-------------|----------------|
| HBB         | 2.573747149  | 2.71E-09    | Up-regulated   |
| HBA2        | 2.160057439  | 0.000000031 | Up-regulated   |
| ENPP2       | 1.361442229  | 0.000519091 | Up-regulated   |
| BMP6        | 1.167051595  | 0.00000944  | Up-regulated   |
| ABCG2       | 1.027422234  | 0.0000226   | Up-regulated   |
| CA2         | 0.793814377  | 3.60E-04    | Up-regulated   |
| CDO1        | 0.697527747  | 0.008809255 | Up-regulated   |
| BTG2        | 0.550681527  | 0.00833395  | Up-regulated   |
| JUN         | 0.519652719  | 0.013539847 | Up-regulated   |
| HBD         | 0.479259714  | 0.002693016 | Up-regulated   |
| VEGFA       | 0.406894794  | 0.004660859 | Up-regulated   |
| CYGB        | 0.361736735  | 0.000747666 | Up-regulated   |
| NEO1        | 0.355296307  | 0.017357097 | Up-regulated   |
| BCL2        | 0.342778806  | 0.00011371  | Up-regulated   |
| ALAS2       | 0.341265324  | 0.012706221 | Up-regulated   |
| HERPUD1     | 0.341166721  | 0.005484379 | Up-regulated   |
| TFDP2       | 0.332752471  | 8.03E-03    | Up-regulated   |
| SCARA5      | 0.332673388  | 0.012683785 | Up-regulated   |
| HEPH        | 0.322354625  | 0.038237251 | Up-regulated   |
| IGSF3       | 0.303331846  | 2.20E-02    | Up-regulated   |
| RNF19A      | 0.301154836  | 0.003986959 | Up-regulated   |
| NUDT4       | 0.295373189  | 5.97E-03    | Up-regulated   |
| RAP1GAP     | 0.291369544  | 0.003492746 | Up-regulated   |
| GABARAPL1   | 0.27683293   | 0.036199859 | Up-regulated   |
| GABPB1      | 0.273490872  | 0.014147668 | Up-regulated   |
| MAPK8       | 0.266316793  | 3.03E-04    | Up-regulated   |
| TSPAN5      | 0.264605096  | 2.71E-02    | Up-regulated   |
| SLC25A28    | 0.256588853  | 0.000895817 | Up-regulated   |
| EPOR        | 0.255145126  | 0.0006535   | Up-regulated   |
| FBXW7       | 0.251025813  | 0.025693917 | Up-regulated   |
| TMEM199     | -0.251147413 | 0.013256487 | Down-regulated |
| PRDX1       | -0.253606198 | 0.0000693   | Down-regulated |
| ATP6V1D     | -0.259191099 | 0.022027048 | Down-regulated |
| NFE2        | -0.263669448 | 0.0247544   | Down-regulated |
| SC5D        | -0.274069579 | 0.034760309 | Down-regulated |
| SQSTM1      | -0.276564879 | 0.002722056 | Down-regulated |
| AIFM2       | -0.29156169  | 0.000165819 | Down-regulated |
| BLVRA       | -0.300414531 | 0.001453126 | Down-regulated |
| MCOLN1      | -0.305023194 | 0.035999755 | Down-regulated |
| SLC22A4     | -0.305836824 | 0.033886512 | Down-regulated |
| DNM2        | -0.331318789 | 0.001196319 | Down-regulated |
| HMBS        | -0.333975649 | 0.004073285 | Down-regulated |
| ATP6V1B2    | -0.337334019 | 0.0000799   | Down-regulated |
| FLT3        | -0.347612091 | 0.00974279  | Down-regulated |
| ATP6V1A     | -0.355101303 | 0.0000497   | Down-regulated |
| BLVRB       | -0.359047166 | 4.81E-03    | Down-regulated |
| ATP6V0D1    | -0.367305774 | 0.008571053 | Down-regulated |
| HTATIP2     | -0.368213212 | 0.000397317 | Down-regulated |
| SCD         | -0.381577518 | 0.022027048 | Down-regulated |
| FLVCR2      | -0.383264464 | 0.012512065 | Down-regulated |
| SLC39A8     | -0.394817761 | 0.008463876 | Down-regulated |
| SLC3A2      | -0.402939154 | 0.001056622 | Down-regulated |
| SLC25A37    | -0.408231759 | 0.005071735 | Down-regulated |
| CTNS        | -0.422643646 | 0.0000434   | Down-regulated |
| HSPA5       | -0.42445206  | 0.037190781 | Down-regulated |

|         |              |             |                |
|---------|--------------|-------------|----------------|
| CTSB    | -0.443300984 | 0.001697036 | Down-regulated |
| GPX2    | -0.44705746  | 0.010434244 | Down-regulated |
| GCLC    | -0.450491283 | 0.011174022 | Down-regulated |
| ABCB6   | -0.459126647 | 0.0000119   | Down-regulated |
| MSMO1   | -0.459453732 | 0.047095921 | Down-regulated |
| GCLM    | -0.482237143 | 0.001005209 | Down-regulated |
| UCP2    | -0.48583649  | 0.018825182 | Down-regulated |
| SLC11A1 | -0.491441728 | 0.02763908  | Down-regulated |
| SLC6A9  | -0.51332698  | 0.0000103   | Down-regulated |
| G6PD    | -0.51658732  | 0.0000198   | Down-regulated |
| TLR4    | -0.521770415 | 0.000311202 | Down-regulated |
| SRXN1   | -0.524839037 | 0.000235263 | Down-regulated |
| CAPG    | -0.528341976 | 0.003860613 | Down-regulated |
| STEAP3  | -0.534129687 | 0.000317353 | Down-regulated |
| TBXAS1  | -0.544825943 | 0.000150462 | Down-regulated |
| FADS2   | -0.565987196 | 0.020965623 | Down-regulated |
| AKR1C3  | -0.58523225  | 0.001089038 | Down-regulated |
| CYBB    | -0.591425536 | 0.011401412 | Down-regulated |
| MPP1    | -0.61651265  | 3.62E-04    | Down-regulated |
| NCF2    | -0.618504721 | 0.000335126 | Down-regulated |
| AKR1C2  | -0.639234931 | 0.010024044 | Down-regulated |
| IDH1    | -0.711495669 | 0.0000119   | Down-regulated |
| CBS     | -0.791207365 | 1.07E-05    | Down-regulated |
| PSAT1   | -0.797090133 | 0.006424486 | Down-regulated |
| PGD     | -0.837316377 | 0.000000342 | Down-regulated |
| TXNRD1  | -0.838781973 | 1.67E-08    | Down-regulated |
| LTF     | -0.884583255 | 1.03E-02    | Down-regulated |
| CTSE    | -0.995644361 | 0.001005209 | Down-regulated |
| SLC7A11 | -1.023905563 | 0.003429183 | Down-regulated |
| CYP1B1  | -1.190036878 | 0.004058066 | Down-regulated |
| NQO1    | -1.233015109 | 0.00000259  | Down-regulated |
| HMOX1   | -1.449264008 | 0.0000712   | Down-regulated |
| LCN2    | -1.564206439 | 0.000164052 | Down-regulated |

---
