# Supplementary material for: Iron Metabolism and Idiopathic Pulmonary Arterial Hypertension: New Insights from Bioinformatic Analysis
Source: Hindawi journal article supplement (doi:10.1155/2021/5669412), 2021-01-01
Supplement: f1 [file 5669412.f1.zip]

| Table S6 The proportion of infiltrating immune cells estimated by the CIBERSORT algorithm in GSE15197 |             |             |             |             |             |             |             |             |             |             |             |             |             |             |             |             |             |             |             |             |             |             |             |             |             |             |             |             |             |             |             |   |  |
|-------------------------------------------------------------------------------------------------------|-------------|-------------|-------------|-------------|-------------|-------------|-------------|-------------|-------------|-------------|-------------|-------------|-------------|-------------|-------------|-------------|-------------|-------------|-------------|-------------|-------------|-------------|-------------|-------------|-------------|-------------|-------------|-------------|-------------|-------------|-------------|---|--|
| Immune cells                                                                                          | GSM379337   | GSM379338   | GSM379339   | GSM379340   | GSM379341   | GSM379342   | GSM379343   | GSM379344   | GSM379345   | GSM379346   | GSM379347   | GSM379348   | GSM379349   | GSM379350   | GSM379351   | GSM379352   | GSM379353   | GSM379354   | GSM379316   | GSM379317   | GSM379318   | GSM379319   | GSM379320   | GSM379321   | GSM379322   | GSM379323   | GSM379324   | GSM379325   | GSM379326   | GSM379327   | GSM379328   |   |  |
| B cells naive                                                                                         | 0           | 0           | 0           | 0           | 0.02270015  | 0.030815368 | 0           | 0           | 0           | 0           | 0.049325149 | 0           | 0           | 0           | 0           | 0.003539908 | 0           | 0           | 0.038976148 | 0.016951396 | 0.013331539 | 0.111032663 | 0           | 0           | 0           | 0           | 0.00630155  | 0           | 0           | 0.054194754 |             |   |  |
| B cells memory                                                                                        | 0.041146789 | 0.020292051 | 0.010221705 | 0.042744021 | 0           | 0           | 0.008747415 | 0.058690119 | 0.019613846 | 0.042092374 | 0.086599109 | 0           | 0.024996504 | 0.053015981 | 0.003574747 | 0.038464394 | 0           | 0.017738078 | 0.053821906 | 0           | 0           | 0           | 0.023921748 | 0.054120985 | 0           | 0           | 0           | 0.009505298 | 0           | 0           | 0           |   |  |
| Plasma cells                                                                                          | 0.06320748  | 0.01696525  | 0.023476391 | 0.045502943 | 0.023143387 | 0.000823733 | 0.008918802 | 0.033053405 | 0.017694976 | 0.017533634 | 0.039776094 | 0           | 0.013487128 | 0.040631619 | 0.007678078 | 0.059973531 | 0           | 0.033869344 | 0.036263694 | 0           | 0.008021058 | 0.009913073 | 0.109312166 | 0.014930751 | 0.045191006 | 0.003506919 | 0.009938383 | 0           | 0.028596125 | 0.036375553 | 0           |   |  |
| T cells CD8                                                                                           | 0.169012528 | 0.152933513 | 0.127542725 | 0.150466065 | 0.154686537 | 0           | 0.138282919 | 0.195458927 | 0.143553706 | 0.025436911 | 0.098637058 | 0.021008831 | 0.335439922 | 0.060728763 | 0.085560031 | 0.10503694  | 0.082336664 | 0.06897453  | 0           | 0.048203649 | 0.051608726 | 0.09530086  | 0.071787014 | 0.113659702 | 0.152922999 | 0.043308902 | 0.045150696 | 0.066689682 | 0.036032898 | 0.151308906 | 0.046298219 |   |  |
| T cells CD4 naive                                                                                     | 0           | 0           | 0           | 0           | 0           | 0           | 0           | 0.02376561  | 0           | 0           | 0           | 0           | 0           | 0           | 0           | 0           | 0           | 0           | 0           | 0           | 0           | 0           | 0           | 0           | 0           | 0           | 0           | 0           | 0           | 0           | 0           |   |  |
| T cells CD4 memory resting                                                                            | 0.017914101 | 0.063793827 | 0.079701981 | 0.014225014 | 0           | 0.025980062 | 0.048241242 | 0           | 0           | 0.07297588  | 0           | 0.070872237 | 0           | 0.041783181 | 0.026771998 | 0.090979219 | 0.113306774 | 0.106299747 | 0.121152021 | 0.048176742 | 0.0461393   | 0.178168441 | 0.07460059  | 0.019060472 | 0           | 0.108188003 | 0.064803288 | 0.00948963  | 0.097248667 | 0.005882107 | 0           |   |  |
| T cells CD4 memory activated                                                                          | 0.000692532 | 0.09708879  | 0.002361099 | 0.013180197 | 0.039021939 | 0.070403056 | 0.059547764 | 0.000475298 | 0.018167805 | 0.006595958 | 0           | 0.107012005 | 0.060472351 | 0.015534842 | 0.05347252  | 0           | 0.018083777 | 0.002502059 | 0.011690592 | 0.034674231 | 0.130121687 | 0           | 0.084892971 | 0           | 0.079481523 | 0           | 0.067910856 | 0           | 0.013453919 | 0.0944801   | 0.046336652 |   |  |
| T cells follicular helper                                                                             | 0           | 0.014640369 | 0           | 0.072497464 | 0.080077057 | 0.068061661 | 0.007369105 | 0.014721433 | 0.038870602 | 0.024119365 | 0.040806967 | 0.019908182 | 0.006603481 | 0.018660544 | 0.057989597 | 0.016887447 | 0.001245179 | 0.021925617 | 0.031018373 | 0.035088159 | 0.009483136 | 0           | 0.047810328 | 0.093925235 | 0.077405102 | 0.031229032 | 0.002215048 | 0.023955266 | 0.010467213 | 0.032341794 | 0.054921544 |   |  |
| T cells regulatory (Tregs)                                                                            | 0.001843098 | 0           | 0           | 0           | 0.015209567 | 0           | 0           | 0.002327764 | 0           | 0           | 0.014179525 | 0           | 0           | 0.005675685 | 0.007219639 | 0.001508435 | 0           | 0.016194607 | 0.005864001 | 0           | 0           | 0.01185658  | 0.003134838 | 0.007500764 | 0           | 0.013271717 | 0           | 0           | 0.018829239 | 0.032475387 |             |   |  |
| T cells gamma delta                                                                                   | 0           | 0           | 0           | 0.036307799 | 0           | 0           | 0           | 0           | 0           | 0           | 0           | 0           | 0           | 0           | 0.008136668 | 0           | 0           | 0           | 0           | 0           | 0           | 0           | 0.000394644 | 0           | 0           | 0           | 0           | 0           | 0           | 0           | 0           |   |  |
| NK cells resting                                                                                      | 0           | 0           | 0           | 0           | 0           | 0           | 0           | 0           | 0           | 0           | 0           | 0           | 0           | 0           | 0           | 0           | 0           | 0           | 0           | 0           | 0.006929751 | 0           | 0           | 0           | 0           | 0           | 0.019770321 | 0           | 0.029720703 | 0           | 0           | 0 |  |
| NK cells activated                                                                                    | 0.038165093 | 0.082549164 | 0.102280645 | 0.120039901 | 0.045641753 | 0.159930294 | 0.07928233  | 0.147281119 | 0.113603095 | 0.023347761 | 0.207605273 | 0.206336427 | 0.144263306 | 0.041156363 | 0.065081699 | 0.086913478 | 0.156890685 | 0.126376128 | 0.15610757  | 0.043678581 | 0.077554186 | 0.209352494 | 0.049573584 | 0.122832192 | 0.012455673 | 0.020117762 | 0.072327714 | 0.010742385 | 0.035707701 | 0.092135808 | 0.036232159 |   |  |
| Monocytes                                                                                             | 0.047726436 | 0.031330619 | 0.124160358 | 0           | 0.044848097 | 0.010201289 | 0.05880327  | 0.024243737 | 0.025479966 | 0.0606555   | 0.035718424 | 0.054237605 | 0.14079636  | 0.127426328 | 0.021465253 | 0.015484582 | 0.013793509 | 0.007750896 | 0.162954393 | 0.092390421 | 0.128908602 | 0.062713237 | 0           | 0.043540981 | 0.040416792 | 0.04094077  | 0.063308393 | 0.118387798 | 0.252650601 | 0.033941392 | 0.051193947 |   |  |
| Macrophages M0                                                                                        | 0.26505228  | 0.125820263 | 0.199873641 | 0.178964784 | 0.317701212 | 0.168712673 | 0.091806737 | 0.169272516 | 0.153679651 | 0.258503159 | 0.062354134 | 0           | 0.021701416 | 0.176335469 | 0.139831708 | 0.127022086 | 0.296756861 | 0.09378172  | 0           | 0.201957425 | 0.133170143 | 0.026674842 | 0.105123485 | 0.160228124 | 0.199511258 | 0.216658704 | 0.151065189 | 0.368962328 | 0.139154918 | 0.061454948 | 0.295910716 |   |  |
| Macrophages M1                                                                                        | 0.007065693 | 0.067601474 | 8.90E-03    | 0.033207455 | 0.019600438 | 0.105968308 | 0.04429803  | 0.097828975 | 0.032349123 | 0.00337465  | 0.008464232 | 0.037453564 | 0.027123951 | 0.009077019 | 0.122214012 | 0.103483796 | 0.006751954 | 0.098993108 | 0.039081356 | 0.036823999 | 0           | 0.073449203 | 0.007458363 | 0.074635047 | 0.027126264 | 0.017566975 | 0.063982078 | 0.00667655  | 0           | 0.06716016  | 0.058658118 |   |  |
| Macrophages M2                                                                                        | 0.274938436 | 0.147111726 | 0.180669402 | 0.228947103 | 0.136089722 | 0.140257526 | 0.122970432 | 0.127342134 | 0.13758194  | 0.318348898 | 0.173503654 | 0.096910606 | 0.1362635   | 0.265336886 | 0.229617958 | 0.275828469 | 0.136088641 | 0.173791162 | 0.166263396 | 0.259690147 | 0.120022626 | 0.126120671 | 0.185048333 | 0.144007624 | 0.167525156 | 0.266892092 | 0.177945564 | 0.137497246 | 0.125532399 | 0.161608467 | 0.155792581 |   |  |
| Dendritic cells resting                                                                               | 0           | 0           | 0           | 0           | 0           | 0           | 0           | 0           | 0           | 0           | 0           | 0           | 0           | 0           | 0.000365659 | 0           | 0           | 0           | 0           | 0           | 0           | 0           | 0           | 0           | 0           | 0           | 0           | 0           | 0           | 0.026219528 | 0           | 0 |  |
| Dendritic cells activated                                                                             | 0           | 0.017038942 | 0.030619583 | 0           | 0           | 0           | 0.000833558 | 0           | 0           | 0.018760541 | 0.002165721 | 0.019212402 | 0           | 0           | 0           | 0.009263307 | 0.016199447 | 0.003923485 | 0           | 0.110175077 | 0           | 0.01656402  | 0           | 0.00987719  | 0.013939539 | 0           | 0           | 0.034036424 | 0           | 0           | 0           | 0 |  |
| Mast cells resting                                                                                    | 0.048109898 | 0           | 0.056408984 | 0           | 0           | 0           | 0           | 0           | 0           | 0.051241562 | 0           | 0           | 0           | 0.054843748 | 0.13980885  | 0.013869456 | 0           | 0.067987826 | 0.04490193  | 0.091597171 | 0.04070177  | 0.107387232 | 0.082372105 | 0           | 0.076873754 | 0.174754659 | 0.035040588 | 0.108703685 | 0.162078507 | 0.085289276 | 0           |   |  |
| Mast cells activated                                                                                  | 0.00182212  | 0.127898037 | 0           | 0.040735203 | 0.056398135 | 0.174600653 | 0.280250139 | 0.100522315 | 0.272457765 | 0.021507423 | 0.17752747  | 0.256880125 | 0.082637894 | 0.046766646 | 0           | 0.040162912 | 0.134857425 | 0.040934123 | 0.081071254 | 0           | 0.034246912 | 0.022640779 | 0.026844099 | 0.114533476 | 0.086823321 | 0           | 0.020833729 | 0           | 0           | 0           | 0           |   |  |
| Eosinophils                                                                                           | 0           | 0.00238741  | 0           | 0           | 0.032047803 | 0.011588368 | 0.030106389 | 0           | 0.004340258 | 0.009543945 | 0           | 0.033148907 | 0           | 0.017258874 | 0           | 0           | 0.011212245 | 0.062982759 | 0.012756232 | 0.018042729 | 0.013675541 | 0.018918755 | 0.001946097 | 0.063639719 | 0.015425617 | 0.067230084 | 0.020839306 | 0.011433214 | 0.016442158 | 0.019928768 | 0           |   |  |
| Neutrophils                                                                                           | 0.023303517 | 0.032548566 | 0.053781327 | 0.02318205  | 0.012834204 | 0.03265701  | 0.02054187  | 0.005016649 | 0.022607268 | 0.045962437 | 0.052662339 | 0.027693959 | 0.006214187 | 0.025768052 | 0.031211584 | 0.024385256 | 0.01587307  | 0.059893458 | 0.062799191 | 0.044836596 | 0.072290089 | 0.056028875 | 0.013382958 | 0.007950091 | 0.024216352 | 0.073777142 | 0.051655381 | 0.175103059 | 0.092467994 | 0.036254723 | 0.082696646 |   |  |
