# Supplementary material for: Iron Metabolism and Idiopathic Pulmonary Arterial Hypertension: New Insights from Bioinformatic Analysis
Source: Biomed Res Int. 2021 Oct 22;2021:5669412. doi: 10.1155/2021/5669412 (PMC8556088; doi:10.1155/2021/5669412)
Supplement: Supplementary Materials — are available online at DOI: 10.6084/m9.figshare.14877513. Figure S1: gene expression vioplot of GSE117261 and GSE15197 after normalization. Figure S2: correlation heat map of differentially expressed iron metabolism-related genes in GSE117261. Figure S3: predicted target genes of downregulated miRNA. Figure S4: predicted target genes of upregulated miRNA. Figure S5: key modules identified by the Cytoscape plugin MCODE. Table S1: the merged iron metabolism-related gene set. Figure S6: correlation heat map of immune cells in GSE117261 and GSE15197. Figure S7: linear regression analysis between expression of key genes and the proportion of immune cells in GSE117261 and GSE15197. Figure S8: top 10 targeted drugs predicted in the DSigDB database ranked by FDR. Table S1: the merged iron metabolism related gene set. Table S2: dysregulated miRNAs in IPAH samples. Table S3: differentially expressed iron metabolism-related gene set. Table S4: rank values of differentially expressed iron metabolism-related genes by MCC algorithm. Table S5: the proportion of infiltrating immune cells estimated by the CIBERSORT algorithm in GSE117261. Table S6: the proportion of infiltrating immune cells estimated by the CIBERSORT algorithm in GSE15197. Table S7: predicted target drug using the DSigDB database. [file 5669412.f1.zip]

Archive with 15 entries (15 files):
- Figure S1 Gene Expression vioplot of GSE117261 and GSE15197 after normalization.pdf
- Figure S2 Correlation heatmap of differentially expressed iron metabolism related genes in GSE117261.pdf
- Figure S3 Predicted target genes of downregulated miRNA.pdf
- Figure S4 Predicted target genes of upregulated miRNA.pdf
- Figure S5 Key modules identified by the Cytoscape plugin MCODE.pdf
- Figure S6 Correlation heatmap of immune cells in GSE117261 and GSE15197.pdf
- Figure S7 Linear regression analysis between expression of key genes and the proportion of immune cells in GSE117261 and GSE15197.pdf
- Figure S8 Top 10 targeted drugs predicted in the DSigDB database ranked by FDR.pdf
- Table S1 The merged iron metabolism related gene set (1).pdf
- Table S2 Dysregulated miRNAs in IPAH samples.pdf
- Table S3 Differentially expressed iron metabolism related gene set.pdf
- Table S4 Rank values of differentially expressed iron metabolism related genes by MCC algorithm.pdf
- Table S5 The proportion of infiltrating immune cells estimated by the CIBERSORT algorithm in GSE117261 (1).pdf
- Table S6 The proportion of infiltrating immune cells estimated by the CIBERSORT algorithm in GSE15197.pdf
- Table S7 Predicted target drug using the DSigDB database.pdf
