# Supplementary material for: Iron Metabolism and Idiopathic Pulmonary Arterial Hypertension: New Insights from Bioinformatic Analysis
Source: Biomed Res Int. 2021 Oct 22;2021:5669412. doi: 10.1155/2021/5669412 (PMC8556088; doi:10.1155/2021/5669412)
Supplement: Supplementary Materials — are available online at DOI: 10.6084/m9.figshare.14877513. Figure S1: gene expression vioplot of GSE117261 and GSE15197 after normalization. Figure S2: correlation heat map of differentially expressed iron metabolism-related genes in GSE117261. Figure S3: predicted target genes of downregulated miRNA. Figure S4: predicted target genes of upregulated miRNA. Figure S5: key modules identified by the Cytoscape plugin MCODE. Table S1: the merged iron metabolism-related gene set. Figure S6: correlation heat map of immune cells in GSE117261 and GSE15197. Figure S7: linear regression analysis between expression of key genes and the proportion of immune cells in GSE117261 and GSE15197. Figure S8: top 10 targeted drugs predicted in the DSigDB database ranked by FDR. Table S1: the merged iron metabolism related gene set. Table S2: dysregulated miRNAs in IPAH samples. Table S3: differentially expressed iron metabolism-related gene set. Table S4: rank values of differentially expressed iron metabolism-related genes by MCC algorithm. Table S5: the proportion of infiltrating immune cells estimated by the CIBERSORT algorithm in GSE117261. Table S6: the proportion of infiltrating immune cells estimated by the CIBERSORT algorithm in GSE15197. Table S7: predicted target drug using the DSigDB database. [file 5669412.f1.zip › Figure S6 Correlation heatmap of immune cells in GSE117261 and GSE15197.pdf]

This heatmap displays the correlation coefficients between 20 different immune cell populations. The color scale indicates the strength and direction of the correlation, ranging from -1.0 (dark blue) to 1.0 (dark red), with white representing zero correlation.

| Cell Population              | Dendritic cells resting | T cells CD8 | T cells gamma delta | B cells memory | T cells CD4 memory activated | Macrophages M1 | Macrophages M2 | T cells follicular helper | NK cells activated | T cells CD4 memory resting | Mast cells resting | Dendritic cells activated | Eosinophils | Plasma cells | Macrophages M0 | B cells naive | Mast cells activated | NK cells resting | T cells CD4 naive | Monocytes | Neutrophils |
|------------------------------|-------------------------|-------------|---------------------|----------------|------------------------------|----------------|----------------|---------------------------|--------------------|----------------------------|--------------------|---------------------------|-------------|--------------|----------------|---------------|----------------------|------------------|-------------------|-----------|-------------|
| Dendritic cells resting      | 1.0                     |             |                     |                |                              |                |                |                           |                    |                            |                    |                           |             |              |                |               |                      |                  |                   |           |             |
| T cells CD8                  | 0.6                     | 1.0         |                     |                |                              |                |                |                           |                    |                            |                    |                           |             |              |                |               |                      |                  |                   |           |             |
| T cells gamma delta          | 0.7                     | 0.9         | 1.0                 |                |                              |                |                |                           |                    |                            |                    |                           |             |              |                |               |                      |                  |                   |           |             |
| B cells memory               | 0.8                     | 0.8         | 0.8                 | 1.0            |                              |                |                |                           |                    |                            |                    |                           |             |              |                |               |                      |                  |                   |           |             |
| T cells CD4 memory activated | 0.7                     | 0.7         | 0.7                 | 0.9            | 1.0                          |                |                |                           |                    |                            |                    |                           |             |              |                |               |                      |                  |                   |           |             |
| Macrophages M1               | 0.6                     | 0.6         | 0.6                 | 0.8            | 0.9                          | 1.0            |                |                           |                    |                            |                    |                           |             |              |                |               |                      |                  |                   |           |             |
| Macrophages M2               | 0.5                     | 0.5         | 0.5                 | 0.7            | 0.8                          | 0.9            | 1.0            |                           |                    |                            |                    |                           |             |              |                |               |                      |                  |                   |           |             |
| T cells follicular helper    | 0.4                     | 0.4         | 0.4                 | 0.6            | 0.7                          | 0.8            | 0.9            | 1.0                       |                    |                            |                    |                           |             |              |                |               |                      |                  |                   |           |             |
| NK cells activated           | 0.3                     | 0.3         | 0.3                 | 0.5            | 0.6                          | 0.7            | 0.8            | 0.9                       | 1.0                |                            |                    |                           |             |              |                |               |                      |                  |                   |           |             |
| T cells CD4 memory resting   | 0.2                     | 0.2         | 0.2                 | 0.4            | 0.5                          | 0.6            | 0.7            | 0.8                       | 0.9                | 1.0                        |                    |                           |             |              |                |               |                      |                  |                   |           |             |
| Mast cells resting           | 0.1                     | 0.1         | 0.1                 | 0.3            | 0.4                          | 0.5            | 0.6            | 0.7                       | 0.8                | 0.9                        | 1.0                |                           |             |              |                |               |                      |                  |                   |           |             |
| Dendritic cells activated    | 0.0                     | 0.0         | 0.0                 | 0.2            | 0.3                          | 0.4            | 0.5            | 0.6                       | 0.7                | 0.8                        | 0.9                | 1.0                       |             |              |                |               |                      |                  |                   |           |             |
| Eosinophils                  | -0.1                    | -0.1        | -0.1                | 0.1            | 0.2                          | 0.3            | 0.4            | 0.5                       | 0.6                | 0.7                        | 0.8                | 0.9                       | 1.0         |              |                |               |                      |                  |                   |           |             |
| Plasma cells                 | -0.2                    | -0.2        | -0.2                | 0.0            | 0.1                          | 0.2            | 0.3            | 0.4                       | 0.5                | 0.6                        | 0.7                | 0.8                       | 0.9         | 1.0          |                |               |                      |                  |                   |           |             |
| Macrophages M0               | -0.3                    | -0.3        | -0.3                | -0.1           | 0.0                          | 0.1            | 0.2            | 0.3                       | 0.4                | 0.5                        | 0.6                | 0.7                       | 0.8         | 0.9          | 1.0            |               |                      |                  |                   |           |             |
| B cells naive                | -0.4                    | -0.4        | -0.4                | -0.2           | -0.1                         | 0.0            | 0.1            | 0.2                       | 0.3                | 0.4                        | 0.5                | 0.6                       | 0.7         | 0.8          | 0.9            | 1.0           |                      |                  |                   |           |             |
| Mast cells activated         | -0.5                    | -0.5        | -0.5                | -0.3           | -0.2                         | -0.1           | 0.0            | 0.1                       | 0.2                | 0.3                        | 0.4                | 0.5                       | 0.6         | 0.7          | 0.8            | 0.9           | 1.0                  |                  |                   |           |             |
| NK cells resting             | -0.6                    | -0.6        | -0.6                | -0.4           | -0.3                         | -0.2           | -0.1           | 0.0                       | 0.1                | 0.2                        | 0.3                | 0.4                       | 0.5         | 0.6          | 0.7            | 0.8           | 0.9                  | 1.0              |                   |           |             |
| T cells CD4 naive            | -0.7                    | -0.7        | -0.7                | -0.5           | -0.4                         | -0.3           | -0.2           | -0.1                      | 0.0                | 0.1                        | 0.2                | 0.3                       | 0.4         | 0.5          | 0.6            | 0.7           | 0.8                  | 0.9              | 1.0               |           |             |
| Monocytes                    | -0.8                    | -0.8        | -0.8                | -0.6           | -0.5                         | -0.4           | -0.3           | -0.2                      | -0.1               | 0.0                        | 0.1                | 0.2                       | 0.3         | 0.4          | 0.5            | 0.6           | 0.7                  | 0.8              | 0.9               | 1.0       |             |
| Neutrophils                  | -0.9                    | -0.9        | -0.9                | -0.7           | -0.6                         | -0.5           | -0.4           | -0.3                      | -0.2               | -0.1                       | 0.0                | 0.1                       | 0.2         | 0.3          | 0.4            | 0.5           | 0.6                  | 0.7              | 0.8               | 0.9       | 1.0         |

Heatmap showing the correlation between various immune cell populations. The color scale ranges from -1.0 (blue) to 1.0 (red). The diagonal is red (1.0 correlation). The heatmap shows that T cells CD4 naive and Macrophages M1 have the highest positive correlations with many other cell types, while Eosinophils and T cells CD4 memory resting have the lowest.
