# Supplementary figures and images for: Iron Metabolism and Idiopathic Pulmonary Arterial Hypertension: New Insights from Bioinformatic Analysis
Source: Hindawi journal article supplement (doi:10.1155/2021/5669412), 2021-01-01

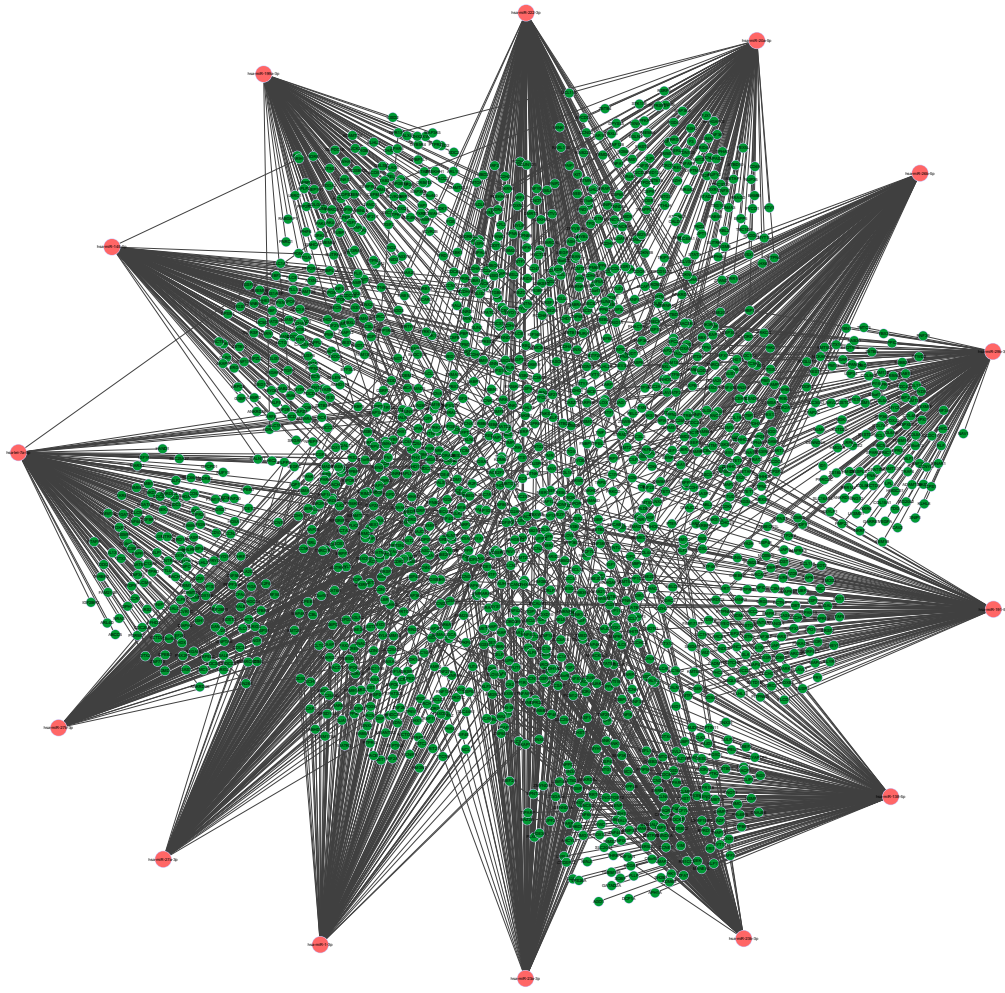

Supplement: f1 [file 5669412.f1.zip]

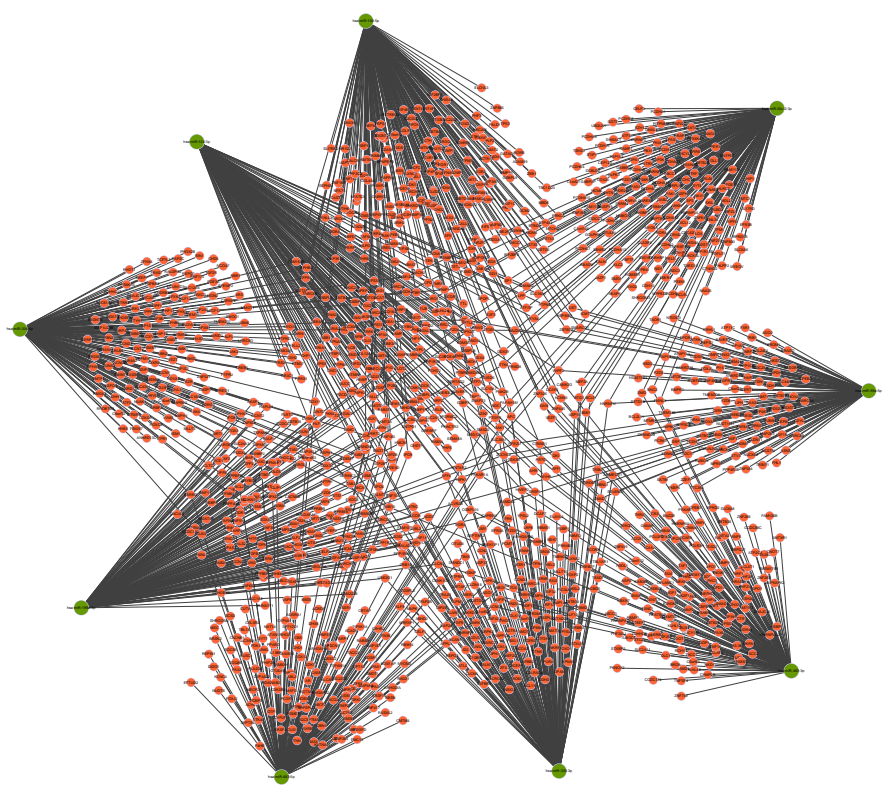

Supplement: f1 [file 5669412.f1.zip]

GSE117261

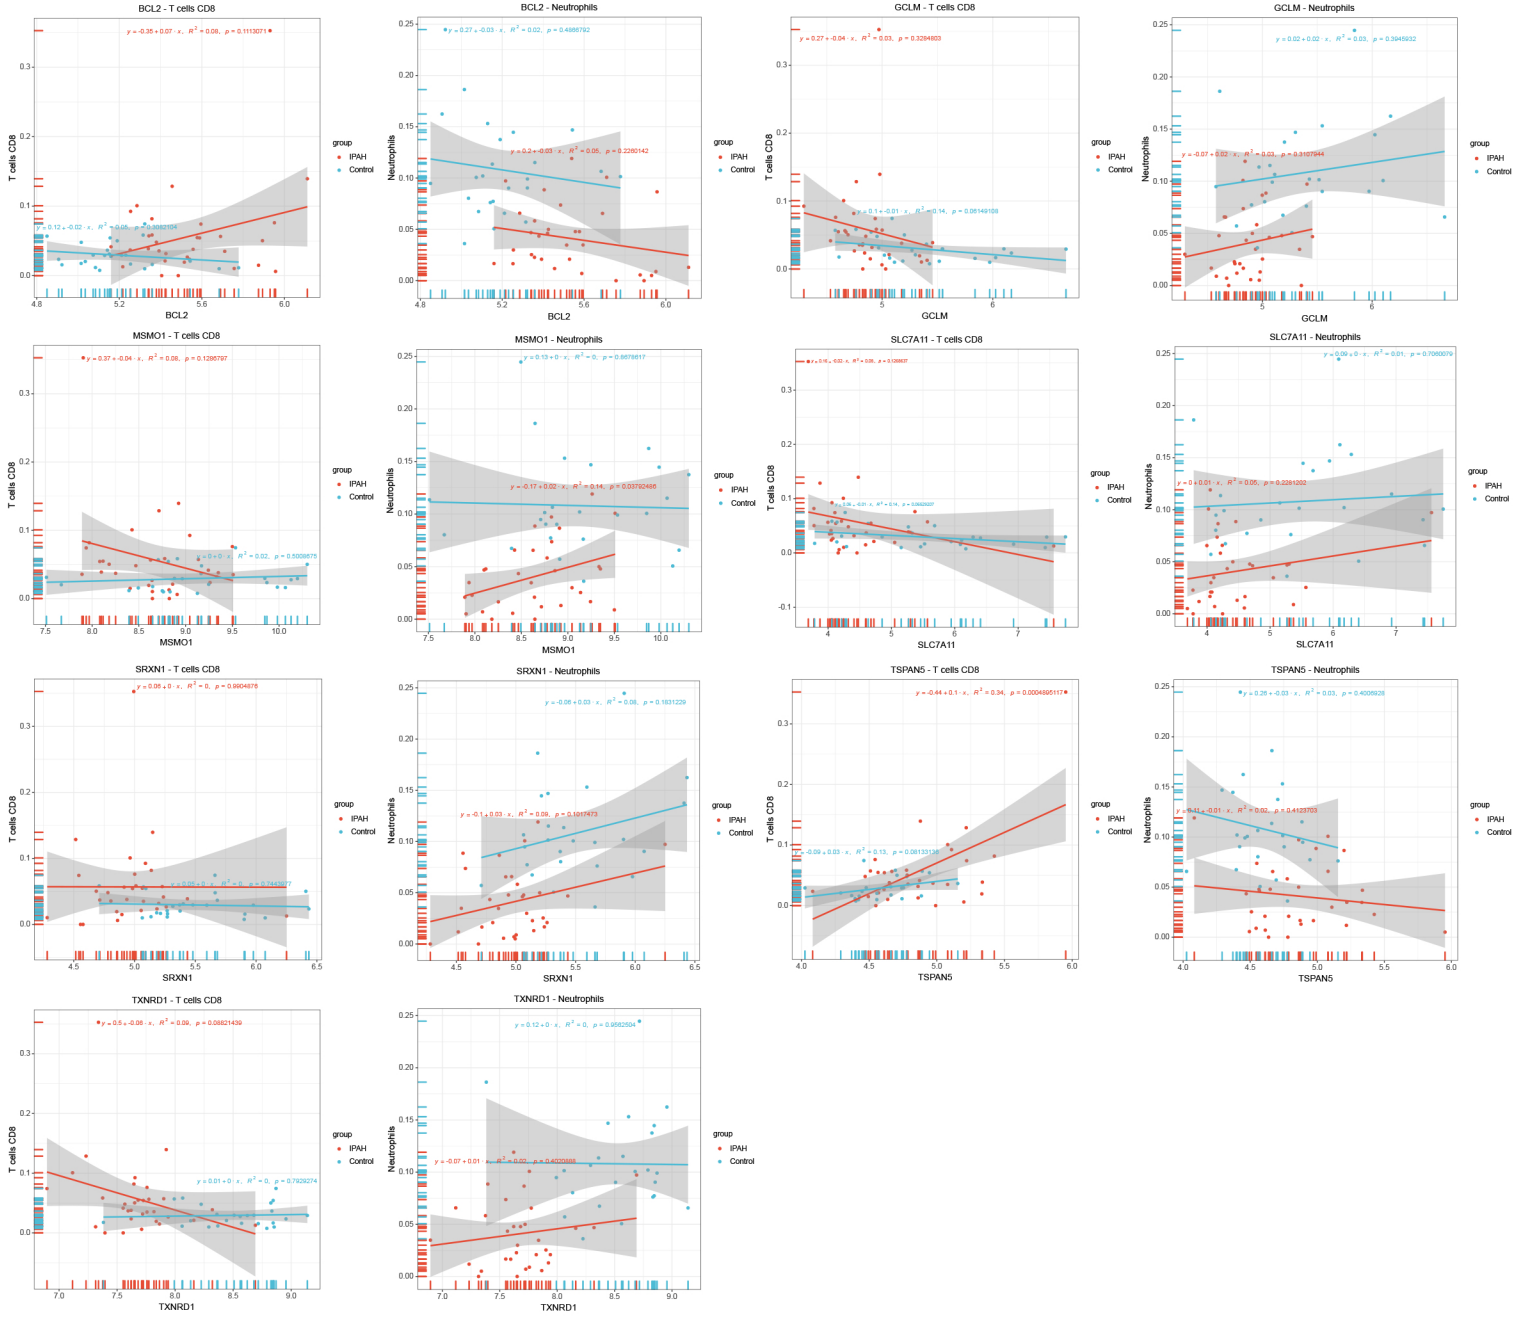

GSE15197

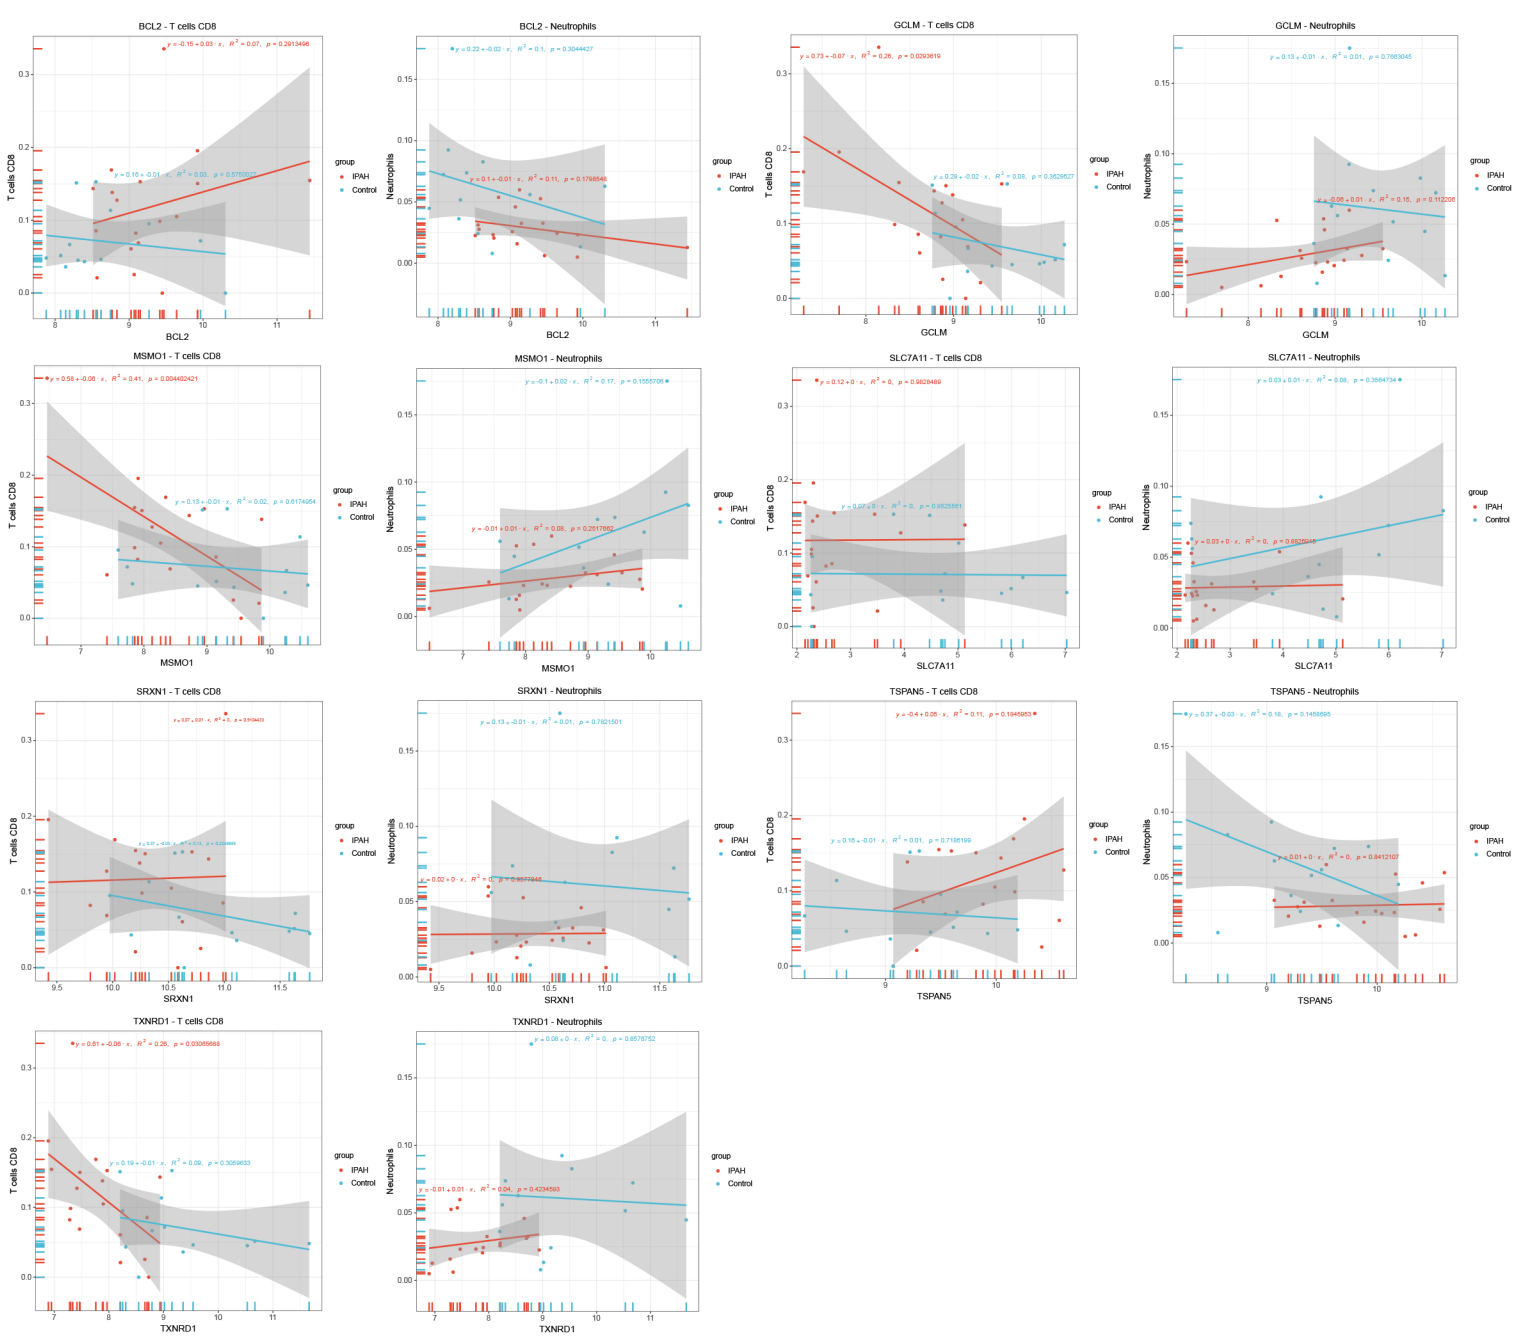

Supplement: f1 [file 5669412.f1.zip]

**A**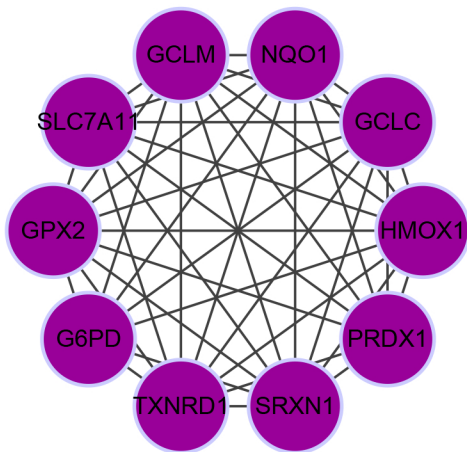**B**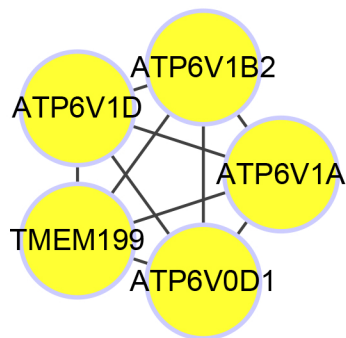**C**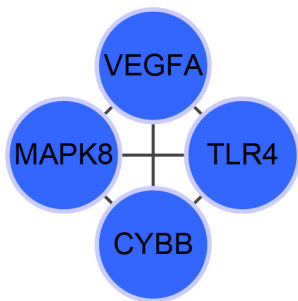

Supplement: f1 [file 5669412.f1.zip]

Correlation heatmap of DEIMRGs in GSE117261

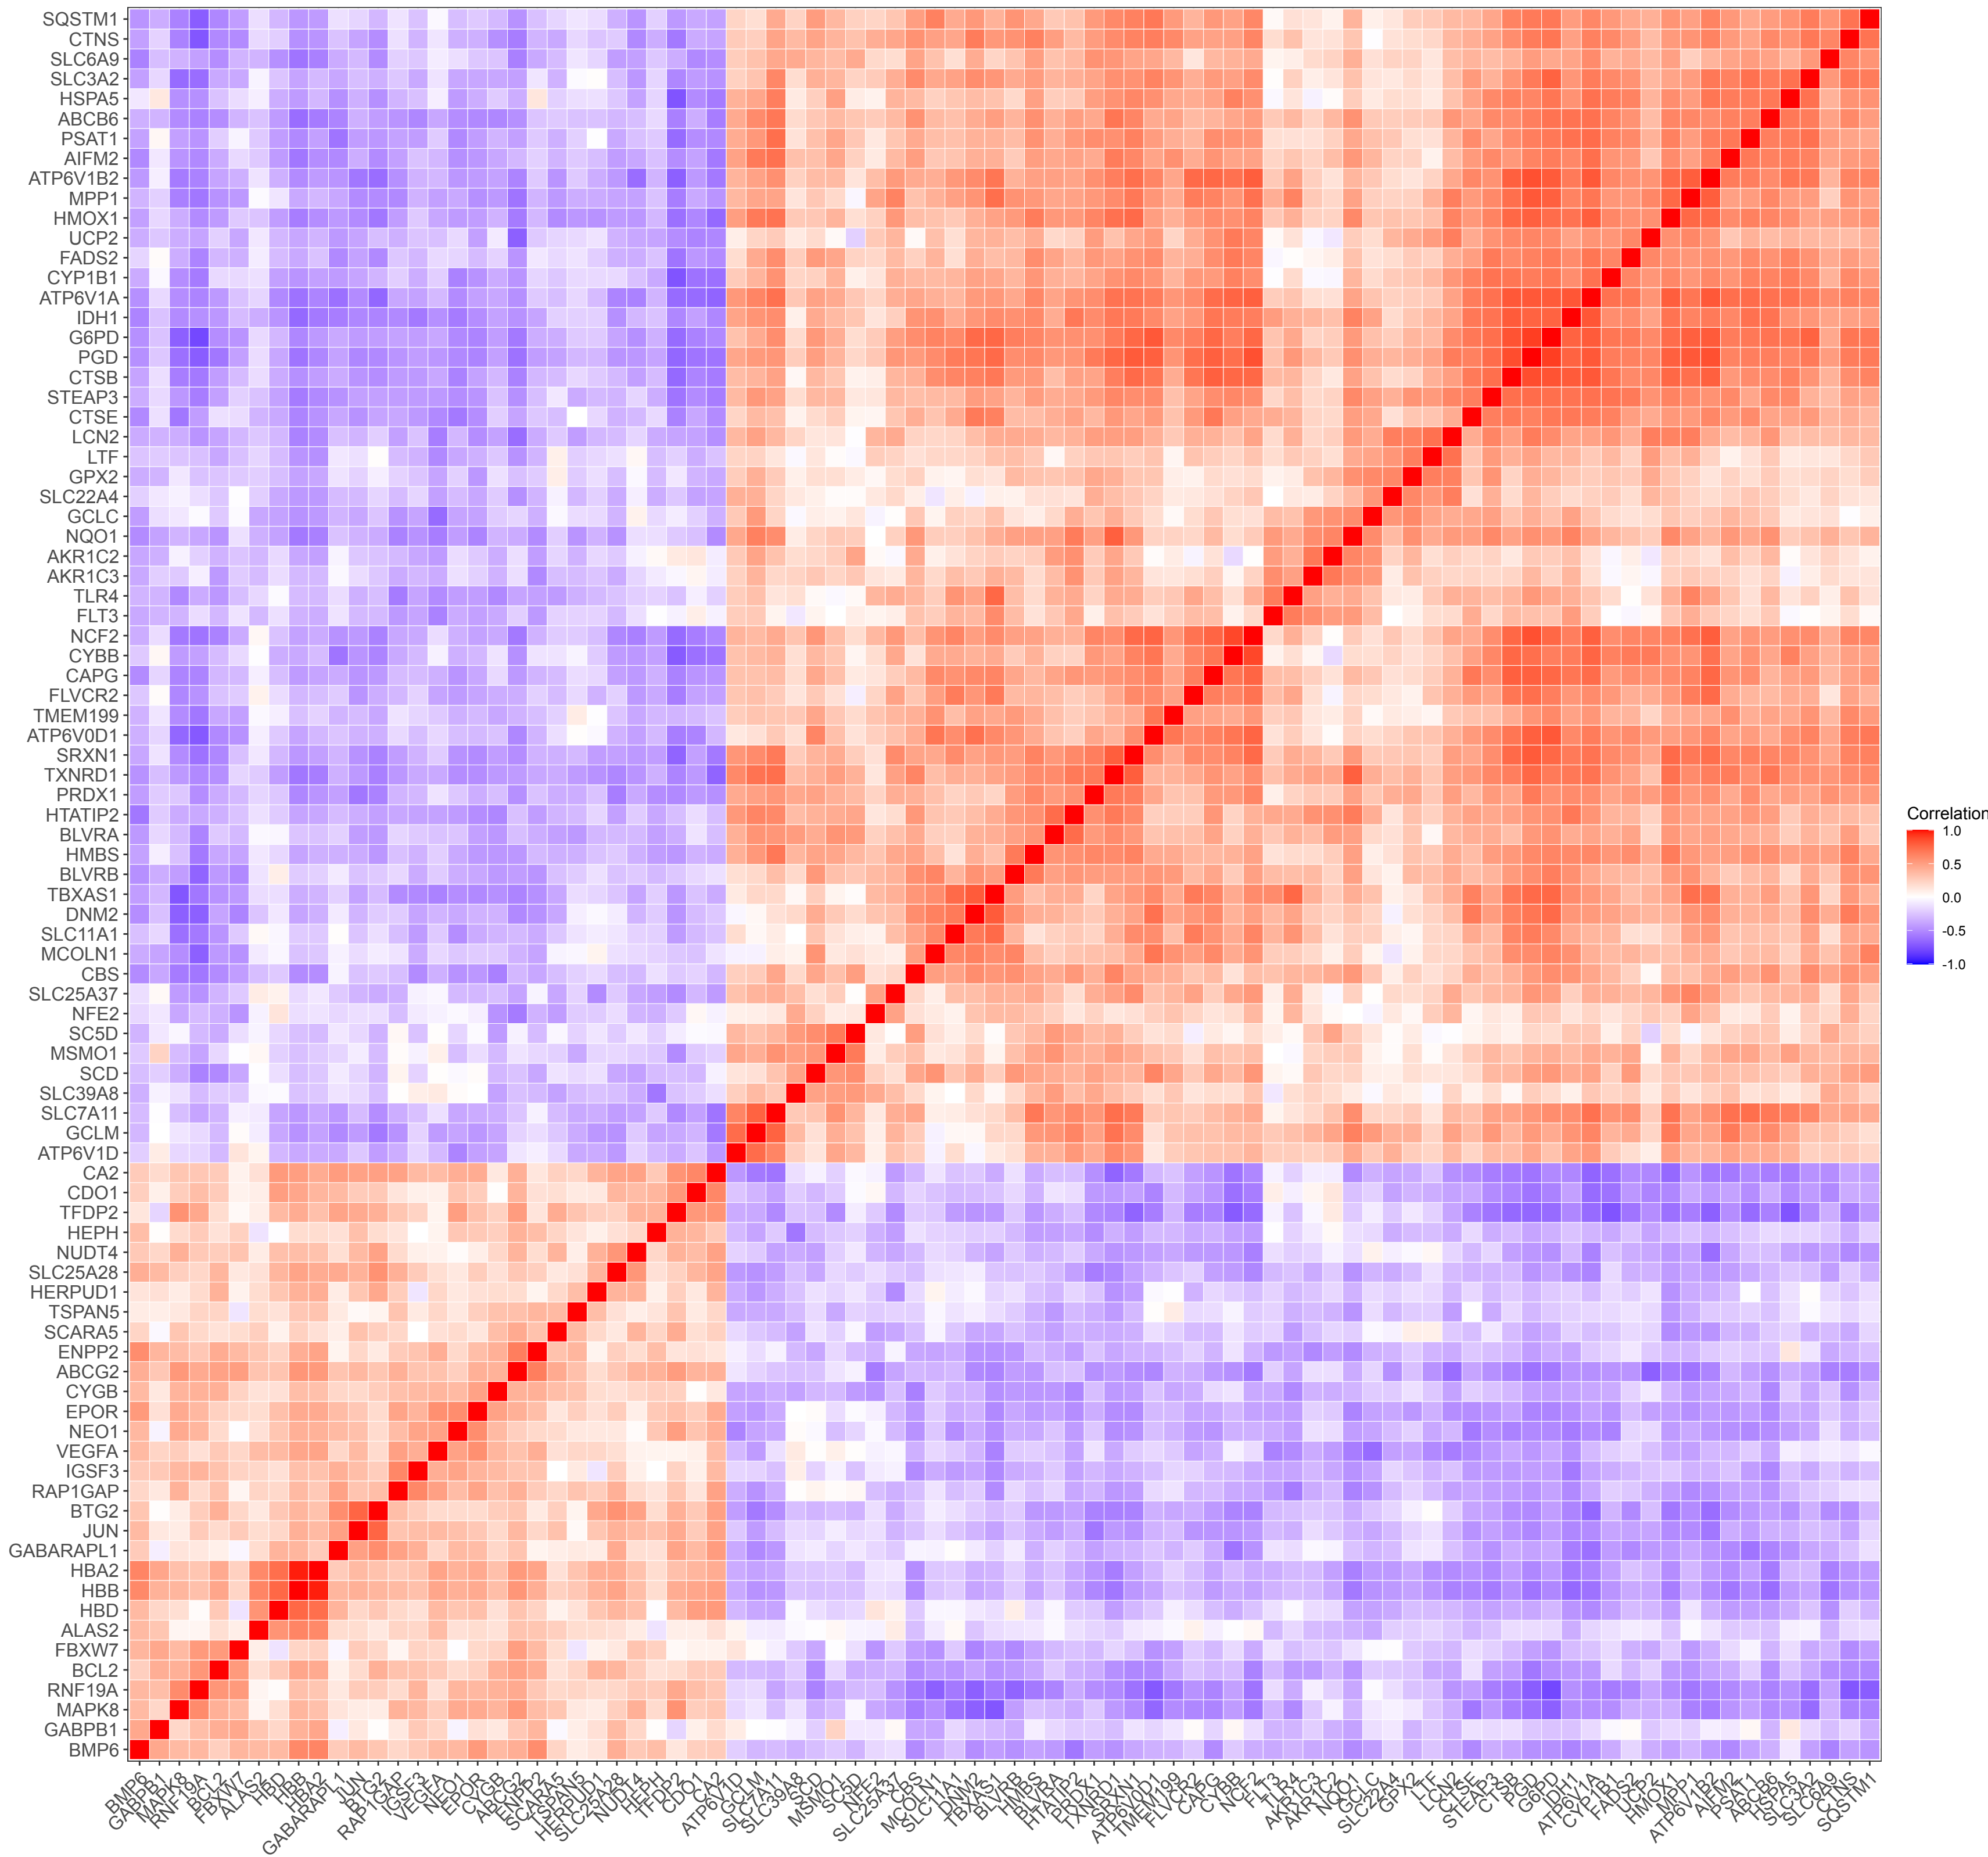

Supplement: f1 [file 5669412.f1.zip]

GSE117261

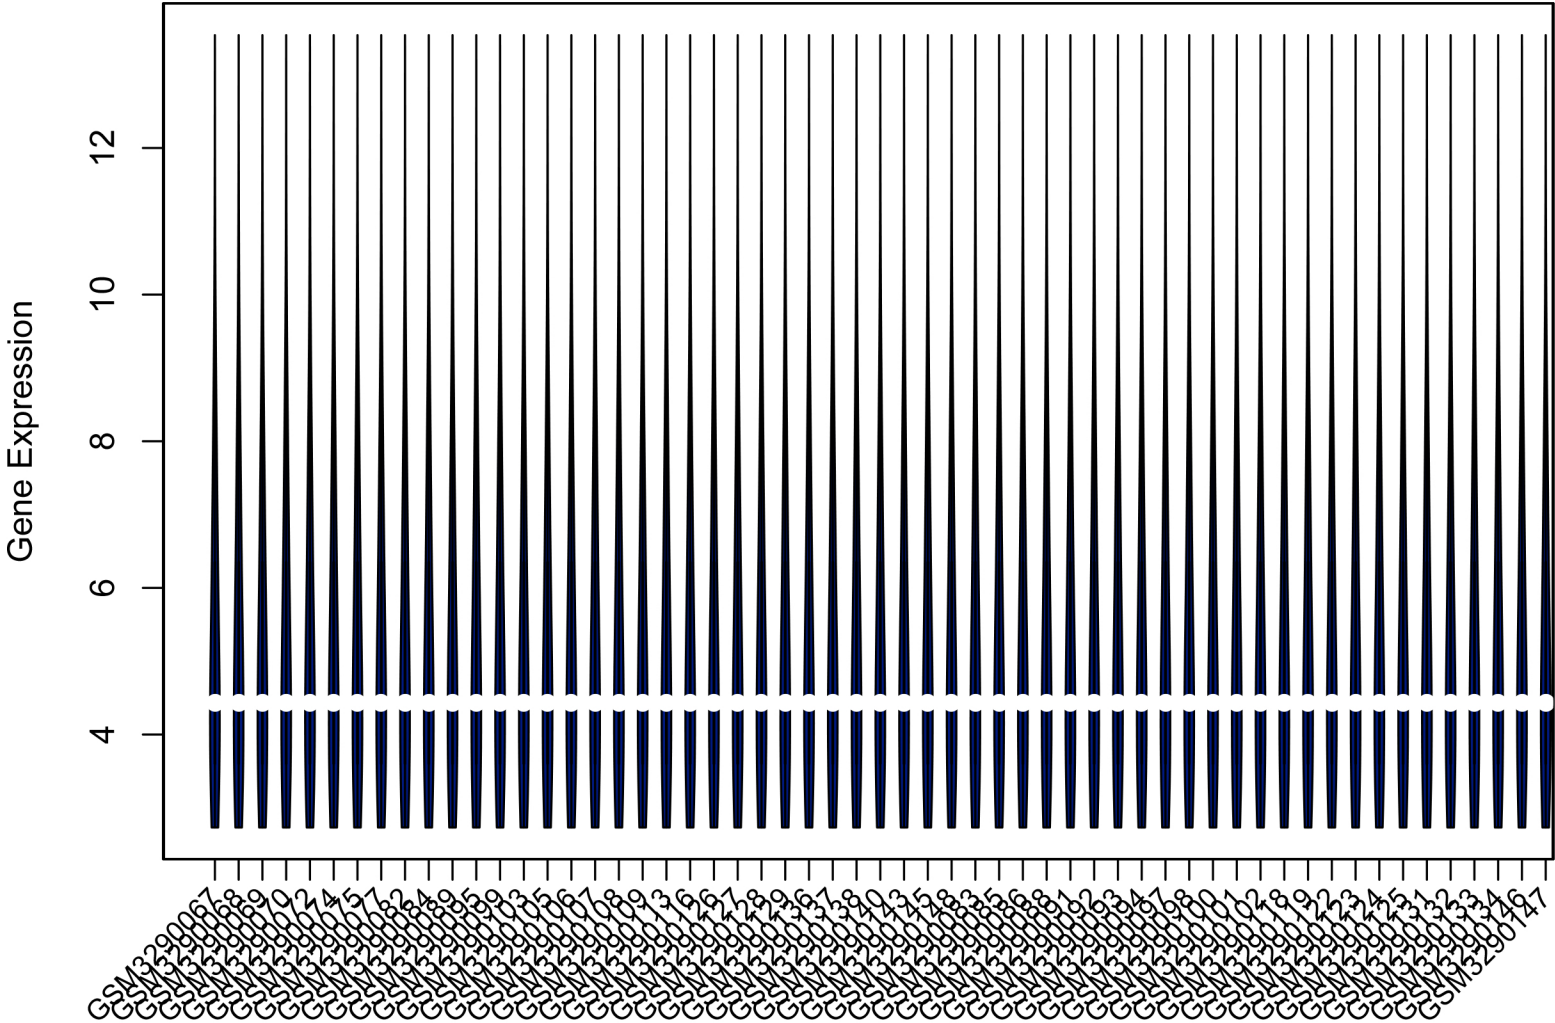

GSE15197

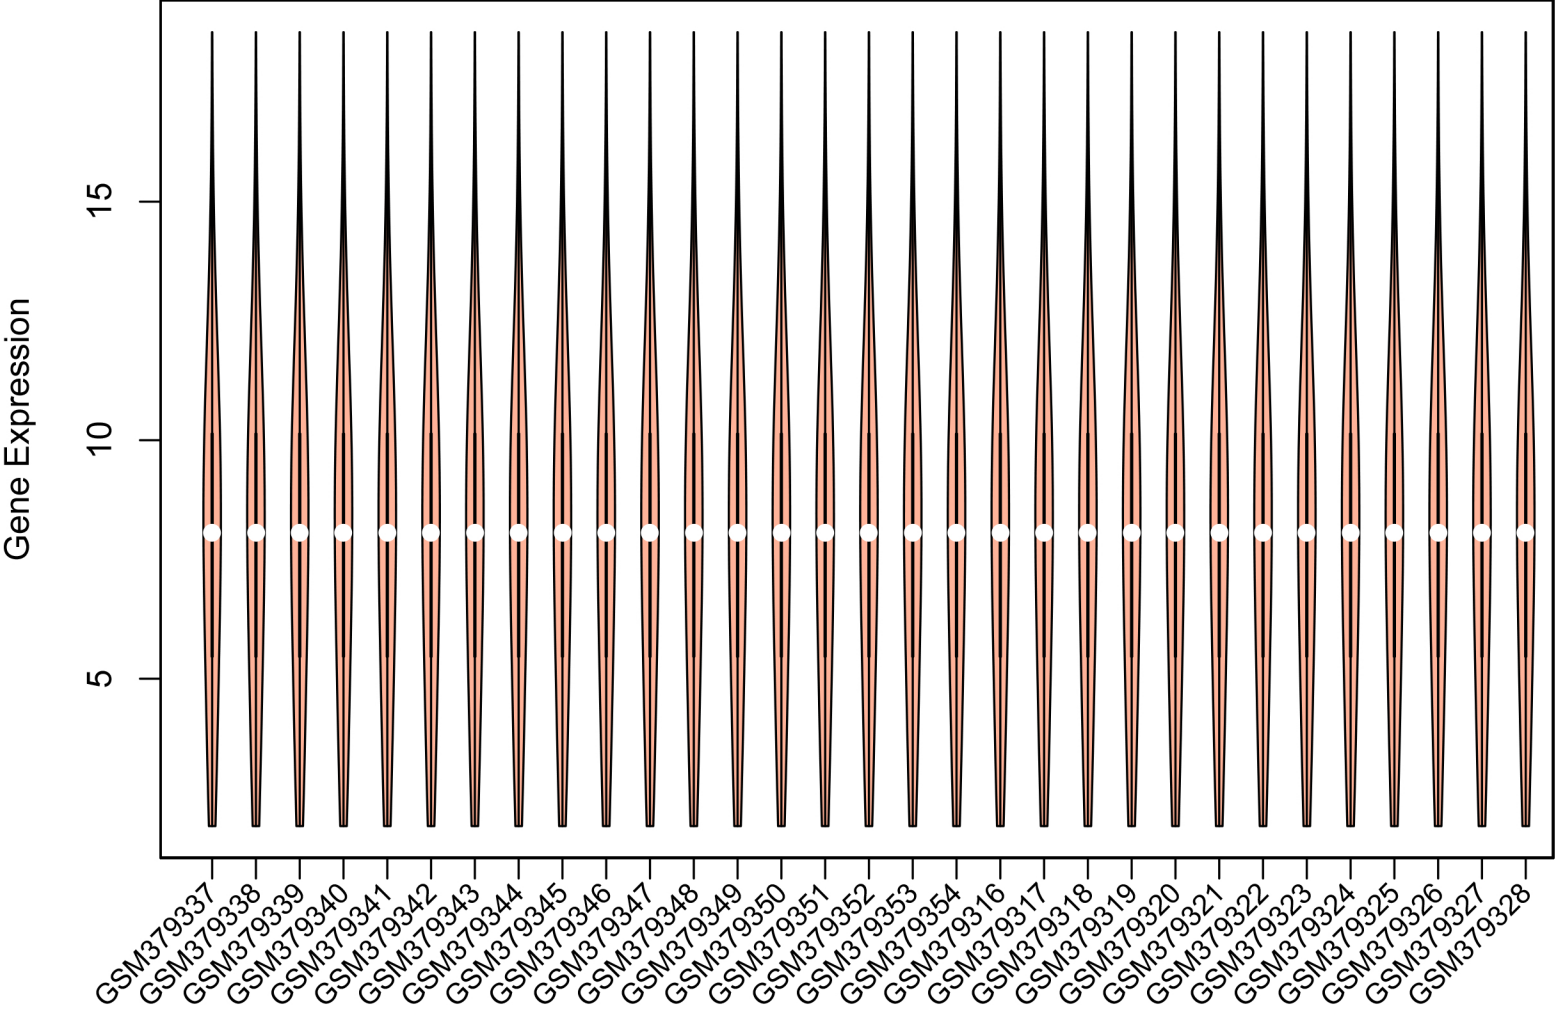

Supplement: f1 [file 5669412.f1.zip]
